# Supplementary material
Source: PubMed Central journal article supplement (PMC2900891)
Supplement: ddn072_1.pdf [file ddn072_1.pdf]

Supplementary Table 1.

Genotyped *CTNBL1* SNPs and their association with BMI and fat mass  
in U.S. Caucasians

| Name              | Position        | Role                          | Allele     | MAF <sup>a</sup> | MAF <sup>b</sup> | P value <sup>c</sup>           |                                |
|-------------------|-----------------|-------------------------------|------------|------------------|------------------|--------------------------------|--------------------------------|
|                   |                 |                               |            |                  |                  | BMI                            | Fat mass                       |
| rs16986890        | 35759937        | Intron1                       | A/G        | 0.08             | 0.07             | 1.38 x 10 <sup>-04</sup>       | 3.11 x 10 <sup>-05</sup>       |
| rs6020339         | 35765409        | Intron1                       | T/C        | 0.37             | 0.32             | 3.05 x 10 <sup>-02</sup>       | 7.05 x 10 <sup>-03</sup>       |
| rs6020395         | 35772738        | Intron1                       | G/C        | 0.06             | 0.07             | 3.46 x 10 <sup>-05</sup>       | 7.71 x 10 <sup>-06</sup>       |
| rs6067491         | 35807549        | Intron3                       | A/G        | 0.33             | 0.27             | 9.49 x 10 <sup>-01</sup>       | 5.50 x 10 <sup>-01</sup>       |
| rs2297154         | 35808485        | Intron4<br>(boundary)         | C/T        | 0.06             | 0.02             | 5.17 x 10 <sup>-01</sup>       | 7.51 x 10 <sup>-01</sup>       |
| <b>rs16986921</b> | <b>35815935</b> | <b>Intron4<br/>(boundary)</b> | <b>C/T</b> | <b>0.06</b>      | <b>0.05</b>      | <b>5.88 x 10<sup>-07</sup></b> | <b>6.54 x 10<sup>-08</sup></b> |
| <b>rs6020712</b>  | <b>35820026</b> | <b>Intron5</b>                | <b>G/A</b> | <b>0.07</b>      | <b>0.05</b>      | <b>7.92 x 10<sup>-07</sup></b> | <b>1.20 x 10<sup>-07</sup></b> |
| <b>rs6013029</b>  | <b>35832994</b> | <b>Intron7</b>                | <b>G/T</b> | <b>0.06</b>      | <b>0.05</b>      | <b>2.69 x 10<sup>-07</sup></b> | <b>4.99 x 10<sup>-08</sup></b> |
| rs6020846         | 35839081        | Intron7<br>(boundary)         | A/G        | 0.08             | 0.07             | 2.45 x 10 <sup>-05</sup>       | 7.01 x 10 <sup>-06</sup>       |
| rs6067638         | 35856110        | Intron10                      | G/A        | 0.33             | 0.28             | 7.09 x 10 <sup>-01</sup>       | 8.08 x 10 <sup>-01</sup>       |
| rs2281146         | 35868271        | Intron11                      | G/A        | 0.20             | 0.19             | 6.58 x 10 <sup>-01</sup>       | 9.93 x 10 <sup>-01</sup>       |
| rs6067731         | 35878290        | Intron11                      | C/T        | 0.34             | 0.32             | 9.10 x 10 <sup>-01</sup>       | 8.54 x 10 <sup>-01</sup>       |
| rs2235478         | 35894982        | Intron11                      | C/G        | 0.19             | 0.19             | 3.65 x 10 <sup>-01</sup>       | 6.51 x 10 <sup>-01</sup>       |
| rs17786860        | 35901053        | Intron11                      | G/A        | 0.18             | 0.19             | 3.63 x 10 <sup>-01</sup>       | 8.72 x 10 <sup>-01</sup>       |
| rs4239666         | 35905013        | Intron13                      | C/A        | 0.19             | 0.19             | 4.39 x 10 <sup>-01</sup>       | 8.47 x 10 <sup>-01</sup>       |
| rs4811199         | 35905087        | Intron13                      | C/T        | 0.20             | 0.19             | 3.27 x 10 <sup>-01</sup>       | 6.65 x 10 <sup>-01</sup>       |
| rs2179319         | 35905168        | Intron13                      | A/G        | 0.19             | 0.19             | 2.47 x 10 <sup>-01</sup>       | 5.84 x 10 <sup>-01</sup>       |
| rs2179320         | 35905199        | Intron13                      | C/T        | 0.20             | 0.19             | 2.47 x 10 <sup>-01</sup>       | 6.25 x 10 <sup>-01</sup>       |
| rs6067831         | 35905482        | Intron13                      | G/T        | 0.19             | 0.19             | 3.50 x 10 <sup>-01</sup>       | 7.13 x 10 <sup>-01</sup>       |
| rs4809859         | 35911642        | Intron13                      | G/T        | 0.19             | 0.18             | 2.31 x 10 <sup>-01</sup>       | 6.29 x 10 <sup>-01</sup>       |
| rs6096513         | 35911699        | Intron13                      | A/C        | 0.35             | 0.36             | 9.90 x 10 <sup>-01</sup>       | 9.12 x 10 <sup>-01</sup>       |
| rs4811210         | 35912877        | Intron13                      | G/A        | 0.19             | 0.19             | 3.24 x 10 <sup>-01</sup>       | 6.96 x 10 <sup>-01</sup>       |
| rs4811211         | 35913041        | Intron13                      | T/C        | 0.19             | 0.15             | 4.92 x 10 <sup>-01</sup>       | 8.72 x 10 <sup>-01</sup>       |
| rs6021357         | 35913673        | Intron13                      | C/T        | 0.19             | 0.19             | 3.95 x 10 <sup>-01</sup>       | 8.10 x 10 <sup>-01</sup>       |
| rs2206135         | 35914069        | Intron13                      | C/T        | 0.41             | 0.43             | 4.34 x 10 <sup>-01</sup>       | 2.02 x 10 <sup>-01</sup>       |
| rs2235461         | 35914397        | Intron13                      | T/C        | 0.19             | 0.19             | 4.36 x 10 <sup>-01</sup>       | 8.46 x 10 <sup>-01</sup>       |
| rs2235460         | 35914457        | Intron13                      | C/T        | 0.40             | 0.43             | 5.08 x 10 <sup>-01</sup>       | 2.63 x 10 <sup>-01</sup>       |
| rs4811246         | 35929171        | Intron15                      | G/A        | 0.25             | 0.25             | 2.43 x 10 <sup>-01</sup>       | 7.37 x 10 <sup>-02</sup>       |
| rs4809875         | 35936717        | 3' UTR                        | C/T        | 0.35             | 0.32             | 9.77 x 10 <sup>-01</sup>       | 9.40 x 10 <sup>-01</sup>       |
| rs6021615         | 35947566        | Promoter                      | C/T        | 0.45             | 0.47             | 2.35 x 10 <sup>-01</sup>       | 1.28 x 10 <sup>-01</sup>       |
| rs6021618         | 35947970        | Promoter                      | C/T        | 0.45             | 0.47             | 1.89 x 10 <sup>-01</sup>       | 1.17 x 10 <sup>-01</sup>       |
| rs6096781         | 35960629        | Promoter                      | T/C        | 0.09             | 0.08             | 1.39 x 10 <sup>-02</sup>       | 3.43 x 10 <sup>-03</sup>       |

- Minor allele frequency in our U.S. Caucasian sample.
- Minor allele frequency reported for Caucasians in the public database of HapMap CEU.
- Raw *P* values.

## Supplementary Table 2.

### Association data for the imputed SNPs at the *CTNBL1* locus in U.S. Caucasians

| BMI       |         |             | Fat mass   |         |             |
|-----------|---------|-------------|------------|---------|-------------|
| SNP       | P Value | FDR q value | SNP        | P Value | FDR q value |
| rs6013337 | 0.088   | 1           | rs4811243  | 0.031   | 1           |
| rs4811243 | 0.088   | 1           | rs6013337  | 0.031   | 1           |
| rs6095912 | 0.167   | 1           | rs6021294  | 0.057   | 1           |
| rs6123116 | 0.208   | 1           | rs4574168  | 0.060   | 1           |
| rs4811280 | 0.208   | 1           | rs6067812  | 0.060   | 1           |
| rs4811278 | 0.208   | 1           | rs6013118  | 0.064   | 1           |
| rs4811279 | 0.208   | 1           | rs6021080  | 0.064   | 1           |
| rs6021294 | 0.221   | 1           | rs6021087  | 0.064   | 1           |
| rs6021354 | 0.222   | 1           | rs4811144  | 0.064   | 1           |
| rs6021353 | 0.222   | 1           | rs4811278  | 0.066   | 1           |
| rs2235463 | 0.222   | 1           | rs4811279  | 0.066   | 1           |
| rs6096498 | 0.222   | 1           | rs4811280  | 0.066   | 1           |
| rs6096517 | 0.222   | 1           | rs6123116  | 0.066   | 1           |
| rs2235465 | 0.222   | 1           | rs6068069  | 0.123   | 1           |
| rs6126267 | 0.222   | 1           | rs1569938  | 0.123   | 1           |
| rs6067812 | 0.227   | 1           | rs6126459  | 0.123   | 1           |
| rs4574168 | 0.227   | 1           | rs6021669  | 0.143   | 1           |
| rs6013118 | 0.237   | 1           | rs8121564  | 0.161   | 1           |
| rs6021080 | 0.237   | 1           | rs6063736  | 0.196   | 1           |
| rs6021087 | 0.237   | 1           | rs6068029  | 0.196   | 1           |
| rs4811144 | 0.237   | 1           | rs6096498  | 0.208   | 1           |
| rs6067525 | 0.247   | 1           | rs6021354  | 0.208   | 1           |
| rs6063736 | 0.289   | 1           | rs6021353  | 0.208   | 1           |
| rs6068029 | 0.289   | 1           | rs2235463  | 0.208   | 1           |
| rs6126459 | 0.298   | 1           | rs2235465  | 0.208   | 1           |
| rs6068069 | 0.298   | 1           | rs6126267  | 0.208   | 1           |
| rs1569938 | 0.298   | 1           | rs6096517  | 0.208   | 1           |
| rs8121564 | 0.318   | 1           | rs6068062  | 0.208   | 1           |
| rs6021669 | 0.322   | 1           | rs6096313  | 0.215   | 1           |
| rs6126457 | 0.406   | 1           | rs6021025  | 0.215   | 1           |
| rs1543332 | 0.407   | 1           | rs6021423  | 0.227   | 1           |
| rs6021283 | 0.407   | 1           | rs11699932 | 0.227   | 1           |
| rs9679781 | 0.407   | 1           | rs6021475  | 0.227   | 1           |
| rs6013215 | 0.407   | 1           | rs7263889  | 0.227   | 1           |
| rs6013216 | 0.407   | 1           | rs6063714  | 0.227   | 1           |
| rs6068062 | 0.427   | 1           | rs2880988  | 0.227   | 1           |
| rs4811247 | 0.469   | 1           | rs4809868  | 0.227   | 1           |
| rs717599  | 0.469   | 1           | rs910760   | 0.227   | 1           |
| rs4811231 | 0.469   | 1           | rs717599   | 0.227   | 1           |
| rs6021423 | 0.469   | 1           | rs6126401  | 0.227   | 1           |
| rs4809868 | 0.469   | 1           | rs4811231  | 0.227   | 1           |
| rs6021475 | 0.469   | 1           | rs4811247  | 0.227   | 1           |
| rs910760  | 0.469   | 1           | rs6091331  | 0.227   | 1           |
| rs2880988 | 0.469   | 1           | rs7269931  | 0.227   | 1           |
| rs7263889 | 0.469   | 1           | rs6021536  | 0.235   | 1           |

|            |       |   |            |       |   |
|------------|-------|---|------------|-------|---|
| rs6063714  | 0.469 | 1 | rs6021378  | 0.235 | 1 |
| rs6126401  | 0.469 | 1 | rs6067889  | 0.235 | 1 |
| rs11699932 | 0.469 | 1 | rs8123046  | 0.235 | 1 |
| rs8123046  | 0.484 | 1 | rs11696760 | 0.239 | 1 |
| rs6021536  | 0.484 | 1 | rs6020987  | 0.264 | 1 |
| rs6067889  | 0.484 | 1 | rs6126457  | 0.270 | 1 |
| rs6021378  | 0.484 | 1 | rs6067495  | 0.280 | 1 |
| rs11696760 | 0.495 | 1 | rs6122978  | 0.280 | 1 |
| rs6096313  | 0.552 | 1 | rs6020740  | 0.280 | 1 |
| rs6021025  | 0.552 | 1 | rs6096451  | 0.280 | 1 |
| rs6091331  | 0.571 | 1 | rs6021221  | 0.280 | 1 |
| rs7269931  | 0.571 | 1 | rs6021634  | 0.355 | 1 |
| rs6020987  | 0.650 | 1 | rs6067393  | 0.356 | 1 |
| rs6096451  | 0.674 | 1 | rs6095981  | 0.356 | 1 |
| rs6067495  | 0.674 | 1 | rs17724627 | 0.356 | 1 |
| rs6020740  | 0.674 | 1 | rs6067482  | 0.356 | 1 |
| rs6122978  | 0.674 | 1 | rs6126043  | 0.356 | 1 |
| rs6021221  | 0.674 | 1 | rs6095912  | 0.373 | 1 |
| rs6021634  | 0.731 | 1 | rs6096512  | 0.375 | 1 |
| rs6096512  | 0.732 | 1 | rs6068059  | 0.392 | 1 |
| rs11699759 | 0.733 | 1 | rs13044362 | 0.405 | 1 |
| rs6021349  | 0.733 | 1 | rs7265129  | 0.405 | 1 |
| rs6020422  | 0.755 | 1 | rs6012862  | 0.410 | 1 |
| rs6068059  | 0.781 | 1 | rs6125954  | 0.410 | 1 |
| rs6123033  | 0.788 | 1 | rs6095813  | 0.410 | 1 |
| rs4811112  | 0.819 | 1 | rs6021399  | 0.424 | 1 |
| rs6020983  | 0.819 | 1 | rs6013249  | 0.424 | 1 |
| rs6091365  | 0.828 | 1 | rs6021392  | 0.424 | 1 |
| rs6096637  | 0.828 | 1 | rs12151942 | 0.426 | 1 |
| rs17725083 | 0.828 | 1 | rs16987016 | 0.426 | 1 |
| rs6126334  | 0.828 | 1 | rs11086362 | 0.426 | 1 |
| rs6096607  | 0.828 | 1 | rs6091397  | 0.426 | 1 |
| rs6096659  | 0.828 | 1 | rs6067981  | 0.426 | 1 |
| rs6126376  | 0.828 | 1 | rs909771   | 0.426 | 1 |
| rs2235477  | 0.833 | 1 | rs6095815  | 0.469 | 1 |
| rs6096442  | 0.833 | 1 | rs6067525  | 0.479 | 1 |
| rs926394   | 0.833 | 1 | rs6091365  | 0.605 | 1 |
| rs6021212  | 0.833 | 1 | rs6126376  | 0.605 | 1 |
| rs17724914 | 0.833 | 1 | rs6096607  | 0.605 | 1 |
| rs6021030  | 0.833 | 1 | rs17725083 | 0.605 | 1 |
| rs6123043  | 0.833 | 1 | rs6126334  | 0.605 | 1 |
| rs7268511  | 0.833 | 1 | rs6096637  | 0.605 | 1 |
| rs238306   | 0.833 | 1 | rs6096659  | 0.605 | 1 |
| rs6123046  | 0.833 | 1 | rs10485479 | 0.667 | 1 |
| rs2294439  | 0.833 | 1 | rs6096185  | 0.667 | 1 |
| rs6021257  | 0.833 | 1 | rs6013088  | 0.667 | 1 |
| rs6021054  | 0.833 | 1 | rs6126084  | 0.667 | 1 |
| rs2235472  | 0.833 | 1 | rs238306   | 0.696 | 1 |
| rs2235473  | 0.833 | 1 | rs6021030  | 0.696 | 1 |
| rs6021088  | 0.833 | 1 | rs6021212  | 0.696 | 1 |

|            |       |   |            |       |   |
|------------|-------|---|------------|-------|---|
| rs6095981  | 0.842 | 1 | rs2235477  | 0.696 | 1 |
| rs6067393  | 0.842 | 1 | rs6096442  | 0.696 | 1 |
| rs6067482  | 0.842 | 1 | rs17724914 | 0.696 | 1 |
| rs17724627 | 0.842 | 1 | rs6021257  | 0.696 | 1 |
| rs6126043  | 0.842 | 1 | rs6021054  | 0.696 | 1 |
| rs6067506  | 0.855 | 1 | rs7268511  | 0.696 | 1 |
| rs238302   | 0.855 | 1 | rs2294439  | 0.696 | 1 |
| rs6021392  | 0.875 | 1 | rs6123043  | 0.696 | 1 |
| rs6013249  | 0.875 | 1 | rs6021088  | 0.696 | 1 |
| rs6021399  | 0.875 | 1 | rs6123046  | 0.696 | 1 |
| rs909771   | 0.878 | 1 | rs2235473  | 0.696 | 1 |
| rs12151942 | 0.878 | 1 | rs2235472  | 0.696 | 1 |
| rs6091397  | 0.878 | 1 | rs926394   | 0.696 | 1 |
| rs6067981  | 0.878 | 1 | rs238302   | 0.732 | 1 |
| rs11086362 | 0.878 | 1 | rs6067506  | 0.732 | 1 |
| rs16987016 | 0.878 | 1 | rs6020983  | 0.732 | 1 |
| rs6125954  | 0.884 | 1 | rs4811112  | 0.732 | 1 |
| rs6095813  | 0.884 | 1 | rs6123033  | 0.750 | 1 |
| rs6012862  | 0.884 | 1 | rs9679781  | 0.787 | 1 |
| rs6096185  | 0.886 | 1 | rs6013216  | 0.787 | 1 |
| rs6126084  | 0.886 | 1 | rs6013215  | 0.787 | 1 |
| rs10485479 | 0.886 | 1 | rs1543332  | 0.787 | 1 |
| rs6013088  | 0.886 | 1 | rs6021283  | 0.787 | 1 |
| rs13044362 | 0.924 | 1 | rs6020422  | 0.810 | 1 |
| rs7265129  | 0.924 | 1 | rs11699759 | 0.994 | 1 |
| rs6095815  | 0.926 | 1 | rs6021349  | 0.994 | 1 |
| rs6091322  | 1     | 1 | rs4811182  | 1     | 1 |
| rs6021213  | 1     | 1 | rs6021198  | 1     | 1 |
| rs6091321  | 1     | 1 | rs6091321  | 1     | 1 |
| rs2294440  | 1     | 1 | rs6021211  | 1     | 1 |
| rs6021211  | 1     | 1 | rs6013188  | 1     | 1 |
| rs2235474  | 1     | 1 | rs6091322  | 1     | 1 |
| rs6096486  | 1     | 1 | rs4811175  | 1     | 1 |
| rs6013209  | 1     | 1 | rs2294440  | 1     | 1 |
| rs4811175  | 1     | 1 | rs6096486  | 1     | 1 |
| rs4811182  | 1     | 1 | rs6021216  | 1     | 1 |
| rs2235471  | 1     | 1 | rs6091328  | 1     | 1 |
| rs6013188  | 1     | 1 | rs6021284  | 1     | 1 |
| rs6096461  | 1     | 1 | rs17724926 | 1     | 1 |
| rs6021198  | 1     | 1 | rs4811194  | 1     | 1 |
| rs2072909  | 1     | 1 | rs6123042  | 1     | 1 |
| rs6091328  | 1     | 1 | rs4811196  | 1     | 1 |
| rs4811196  | 1     | 1 | rs6013209  | 1     | 1 |
| rs4811194  | 1     | 1 | rs2235479  | 1     | 1 |
| rs2235479  | 1     | 1 | rs1546868  | 1     | 1 |
| rs6013217  | 1     | 1 | rs6013217  | 1     | 1 |
| rs1546868  | 1     | 1 | rs1546869  | 1     | 1 |
| rs2294441  | 1     | 1 | rs6096446  | 1     | 1 |
| rs6013221  | 1     | 1 | rs2072909  | 1     | 1 |
| rs6021216  | 1     | 1 | rs6013221  | 1     | 1 |

|            |   |   |            |   |   |
|------------|---|---|------------|---|---|
| rs6123042  | 1 | 1 | rs2235471  | 1 | 1 |
| rs1546869  | 1 | 1 | rs16986967 | 1 | 1 |
| rs6096446  | 1 | 1 | rs6021213  | 1 | 1 |
| rs16986967 | 1 | 1 | rs6021235  | 1 | 1 |
| rs6021235  | 1 | 1 | rs6126377  | 1 | 1 |
| rs6126377  | 1 | 1 | rs6096666  | 1 | 1 |
| rs6096666  | 1 | 1 | rs6126402  | 1 | 1 |
| rs6126402  | 1 | 1 | rs4809878  | 1 | 1 |
| rs4809878  | 1 | 1 | rs6021548  | 1 | 1 |
| rs6021548  | 1 | 1 | rs6126390  | 1 | 1 |
| rs6126390  | 1 | 1 | rs6068008  | 1 | 1 |
| rs6068008  | 1 | 1 | rs6126378  | 1 | 1 |
| rs6126378  | 1 | 1 | rs4811265  | 1 | 1 |
| rs4811265  | 1 | 1 | rs6512765  | 1 | 1 |
| rs6512765  | 1 | 1 | rs6021538  | 1 | 1 |
| rs6021538  | 1 | 1 | rs4809874  | 1 | 1 |
| rs4809874  | 1 | 1 | rs6068000  | 1 | 1 |
| rs6068000  | 1 | 1 | rs8122047  | 1 | 1 |
| rs8122047  | 1 | 1 | rs7270447  | 1 | 1 |
| rs7270447  | 1 | 1 | rs6096639  | 1 | 1 |
| rs6096639  | 1 | 1 | rs6067989  | 1 | 1 |
| rs6067989  | 1 | 1 | rs8117394  | 1 | 1 |
| rs8117394  | 1 | 1 | rs8121556  | 1 | 1 |
| rs8121556  | 1 | 1 | rs4809891  | 1 | 1 |
| rs4809891  | 1 | 1 | rs4811296  | 1 | 1 |
| rs4811296  | 1 | 1 | rs6126462  | 1 | 1 |
| rs6126462  | 1 | 1 | rs11086367 | 1 | 1 |
| rs11086367 | 1 | 1 | rs4811284  | 1 | 1 |
| rs4811284  | 1 | 1 | rs6126447  | 1 | 1 |
| rs6126447  | 1 | 1 | rs6068052  | 1 | 1 |
| rs6068052  | 1 | 1 | rs6096781  | 1 | 1 |
| rs6096781  | 1 | 1 | rs6021610  | 1 | 1 |
| rs6021610  | 1 | 1 | rs6013341  | 1 | 1 |
| rs6013341  | 1 | 1 | rs6021605  | 1 | 1 |
| rs6021585  | 1 | 1 | rs6021585  | 1 | 1 |
| rs6126413  | 1 | 1 | rs6126413  | 1 | 1 |
| rs6096675  | 1 | 1 | rs6096675  | 1 | 1 |
| rs6091405  | 1 | 1 | rs6091405  | 1 | 1 |
| rs4809871  | 1 | 1 | rs4809871  | 1 | 1 |
| rs6021529  | 1 | 1 | rs6021529  | 1 | 1 |
| rs4811221  | 1 | 1 | rs4811221  | 1 | 1 |
| rs8117787  | 1 | 1 | rs8117787  | 1 | 1 |
| rs4811233  | 1 | 1 | rs4811233  | 1 | 1 |
| rs2235456  | 1 | 1 | rs2235456  | 1 | 1 |
| rs2235457  | 1 | 1 | rs2235457  | 1 | 1 |
| rs6021393  | 1 | 1 | rs6021393  | 1 | 1 |
| rs16986987 | 1 | 1 | rs16986987 | 1 | 1 |
| rs11700341 | 1 | 1 | rs11700341 | 1 | 1 |
| rs6021388  | 1 | 1 | rs6021388  | 1 | 1 |
| rs6126335  | 1 | 1 | rs6126335  | 1 | 1 |

|            |   |   |            |   |   |
|------------|---|---|------------|---|---|
| rs7270442  | 1 | 1 | rs7270442  | 1 | 1 |
| rs11698979 | 1 | 1 | rs11698979 | 1 | 1 |
| rs6067854  | 1 | 1 | rs6067854  | 1 | 1 |
| rs6013238  | 1 | 1 | rs6013238  | 1 | 1 |
| rs4811236  | 1 | 1 | rs4811236  | 1 | 1 |
| rs6067945  | 1 | 1 | rs6067945  | 1 | 1 |
| rs6091392  | 1 | 1 | rs6091392  | 1 | 1 |
| rs6067971  | 1 | 1 | rs6067971  | 1 | 1 |
| rs910759   | 1 | 1 | rs910759   | 1 | 1 |
| rs7354556  | 1 | 1 | rs7354556  | 1 | 1 |
| rs6096611  | 1 | 1 | rs6096611  | 1 | 1 |
| rs6096608  | 1 | 1 | rs6096608  | 1 | 1 |
| rs6021480  | 1 | 1 | rs6021480  | 1 | 1 |
| rs2344914  | 1 | 1 | rs2344914  | 1 | 1 |
| rs1106966  | 1 | 1 | rs1106966  | 1 | 1 |
| rs16987001 | 1 | 1 | rs16987001 | 1 | 1 |
| rs4811239  | 1 | 1 | rs4811239  | 1 | 1 |
| rs4811238  | 1 | 1 | rs4811238  | 1 | 1 |
| rs6067927  | 1 | 1 | rs6067927  | 1 | 1 |
| rs6021428  | 1 | 1 | rs6021428  | 1 | 1 |
| rs6067923  | 1 | 1 | rs6067923  | 1 | 1 |
| rs6091363  | 1 | 1 | rs6091363  | 1 | 1 |
| rs1474623  | 1 | 1 | rs1474623  | 1 | 1 |
| rs6096503  | 1 | 1 | rs6096503  | 1 | 1 |
| rs7264772  | 1 | 1 | rs7264772  | 1 | 1 |
| rs6096047  | 1 | 1 | rs6096047  | 1 | 1 |
| rs6096045  | 1 | 1 | rs6096045  | 1 | 1 |
| rs6126058  | 1 | 1 | rs6126058  | 1 | 1 |
| rs6020623  | 1 | 1 | rs6020623  | 1 | 1 |
| rs7270391  | 1 | 1 | rs7270391  | 1 | 1 |
| rs6020613  | 1 | 1 | rs6020613  | 1 | 1 |
| rs11906959 | 1 | 1 | rs11906959 | 1 | 1 |
| rs11905593 | 1 | 1 | rs11905593 | 1 | 1 |
| rs16986916 | 1 | 1 | rs16986916 | 1 | 1 |
| rs6122950  | 1 | 1 | rs6122950  | 1 | 1 |
| rs6020550  | 1 | 1 | rs6020550  | 1 | 1 |
| rs6126041  | 1 | 1 | rs6126041  | 1 | 1 |
| rs6020584  | 1 | 1 | rs6020584  | 1 | 1 |
| rs6126032  | 1 | 1 | rs6126032  | 1 | 1 |
| rs6091175  | 1 | 1 | rs6091175  | 1 | 1 |
| rs6126031  | 1 | 1 | rs6126031  | 1 | 1 |
| rs6095992  | 1 | 1 | rs6095992  | 1 | 1 |
| rs6020581  | 1 | 1 | rs6020581  | 1 | 1 |
| rs6063531  | 1 | 1 | rs6063531  | 1 | 1 |
| rs6020578  | 1 | 1 | rs6020578  | 1 | 1 |
| rs6067477  | 1 | 1 | rs6067477  | 1 | 1 |
| rs6020575  | 1 | 1 | rs6020575  | 1 | 1 |
| rs6126062  | 1 | 1 | rs6126062  | 1 | 1 |
| rs6063543  | 1 | 1 | rs6063543  | 1 | 1 |
| rs6067533  | 1 | 1 | rs6067533  | 1 | 1 |

|            |   |   |            |   |   |
|------------|---|---|------------|---|---|
| rs6067547  | 1 | 1 | rs6067547  | 1 | 1 |
| rs6126098  | 1 | 1 | rs6126098  | 1 | 1 |
| rs4274648  | 1 | 1 | rs4274648  | 1 | 1 |
| rs6020727  | 1 | 1 | rs6020727  | 1 | 1 |
| rs6126090  | 1 | 1 | rs6126090  | 1 | 1 |
| rs6020722  | 1 | 1 | rs6020722  | 1 | 1 |
| rs6020720  | 1 | 1 | rs6020720  | 1 | 1 |
| rs6067536  | 1 | 1 | rs6067536  | 1 | 1 |
| rs16986924 | 1 | 1 | rs16986924 | 1 | 1 |
| rs6067535  | 1 | 1 | rs6067535  | 1 | 1 |
| rs6067534  | 1 | 1 | rs6067534  | 1 | 1 |
| rs6126063  | 1 | 1 | rs6126063  | 1 | 1 |
| rs7265394  | 1 | 1 | rs7265394  | 1 | 1 |
| rs6067531  | 1 | 1 | rs6067531  | 1 | 1 |
| rs6067519  | 1 | 1 | rs6067519  | 1 | 1 |
| rs6063547  | 1 | 1 | rs6063547  | 1 | 1 |
| rs6067508  | 1 | 1 | rs6067508  | 1 | 1 |
| rs6063545  | 1 | 1 | rs6063545  | 1 | 1 |
| rs1330020  | 1 | 1 | rs1330020  | 1 | 1 |
| rs6067505  | 1 | 1 | rs6067505  | 1 | 1 |
| rs11907605 | 1 | 1 | rs11907605 | 1 | 1 |
| rs6126066  | 1 | 1 | rs6126066  | 1 | 1 |
| rs6096105  | 1 | 1 | rs6096105  | 1 | 1 |
| rs6020326  | 1 | 1 | rs6020326  | 1 | 1 |
| rs6067370  | 1 | 1 | rs6067370  | 1 | 1 |
| rs6091111  | 1 | 1 | rs6091111  | 1 | 1 |
| rs6020360  | 1 | 1 | rs6020360  | 1 | 1 |
| rs1884635  | 1 | 1 | rs1884635  | 1 | 1 |
| rs6012874  | 1 | 1 | rs6012874  | 1 | 1 |
| rs6020351  | 1 | 1 | rs6020351  | 1 | 1 |
| rs6020340  | 1 | 1 | rs6020340  | 1 | 1 |
| rs6020338  | 1 | 1 | rs6020338  | 1 | 1 |
| rs6020337  | 1 | 1 | rs6020337  | 1 | 1 |
| rs6095807  | 1 | 1 | rs6095807  | 1 | 1 |
| rs6020279  | 1 | 1 | rs6020279  | 1 | 1 |
| rs6020325  | 1 | 1 | rs6020325  | 1 | 1 |
| rs6012863  | 1 | 1 | rs6012863  | 1 | 1 |
| rs6012860  | 1 | 1 | rs6012860  | 1 | 1 |
| rs6091103  | 1 | 1 | rs6091103  | 1 | 1 |
| rs8124690  | 1 | 1 | rs8124690  | 1 | 1 |
| rs6067361  | 1 | 1 | rs6067361  | 1 | 1 |
| rs6020294  | 1 | 1 | rs6020294  | 1 | 1 |
| rs6125916  | 1 | 1 | rs6125916  | 1 | 1 |
| rs6020286  | 1 | 1 | rs6020286  | 1 | 1 |
| rs6020280  | 1 | 1 | rs6020280  | 1 | 1 |
| rs13037287 | 1 | 1 | rs13037287 | 1 | 1 |
| rs12624423 | 1 | 1 | rs12624423 | 1 | 1 |
| rs8184210  | 1 | 1 | rs8184210  | 1 | 1 |
| rs6122902  | 1 | 1 | rs6122902  | 1 | 1 |
| rs6122935  | 1 | 1 | rs6122935  | 1 | 1 |

|           |   |   |           |   |   |
|-----------|---|---|-----------|---|---|
| rs6126011 | 1 | 1 | rs6126011 | 1 | 1 |
| rs8183239 | 1 | 1 | rs8183239 | 1 | 1 |
| rs6095953 | 1 | 1 | rs6095953 | 1 | 1 |
| rs6126002 | 1 | 1 | rs6126002 | 1 | 1 |
| rs6122929 | 1 | 1 | rs6122929 | 1 | 1 |
| rs6095926 | 1 | 1 | rs6095926 | 1 | 1 |
| rs6125996 | 1 | 1 | rs6125996 | 1 | 1 |
| rs6122920 | 1 | 1 | rs6122920 | 1 | 1 |
| rs6125984 | 1 | 1 | rs6125984 | 1 | 1 |
| rs4811030 | 1 | 1 | rs4811030 | 1 | 1 |
| rs6125949 | 1 | 1 | rs6125949 | 1 | 1 |
| rs6067400 | 1 | 1 | rs6067400 | 1 | 1 |
| rs6095861 | 1 | 1 | rs6095861 | 1 | 1 |
| rs6020419 | 1 | 1 | rs6020419 | 1 | 1 |
| rs6012889 | 1 | 1 | rs6012889 | 1 | 1 |
| rs6125962 | 1 | 1 | rs6125962 | 1 | 1 |
| rs6125959 | 1 | 1 | rs6125959 | 1 | 1 |
| rs6125957 | 1 | 1 | rs6125957 | 1 | 1 |
| rs6125953 | 1 | 1 | rs6125953 | 1 | 1 |
| rs6067377 | 1 | 1 | rs6067377 | 1 | 1 |
| rs6020386 | 1 | 1 | rs6020386 | 1 | 1 |
| rs6067463 | 1 | 1 | rs6067463 | 1 | 1 |
| rs6021053 | 1 | 1 | rs6021053 | 1 | 1 |
| rs6512714 | 1 | 1 | rs6512714 | 1 | 1 |
| rs6021081 | 1 | 1 | rs6021081 | 1 | 1 |
| rs6126202 | 1 | 1 | rs6126202 | 1 | 1 |
| rs4811143 | 1 | 1 | rs4811143 | 1 | 1 |
| rs6013121 | 1 | 1 | rs6013121 | 1 | 1 |
| rs6013120 | 1 | 1 | rs6013120 | 1 | 1 |
| rs6021067 | 1 | 1 | rs6021067 | 1 | 1 |
| rs6021063 | 1 | 1 | rs6021063 | 1 | 1 |
| rs2294442 | 1 | 1 | rs2294442 | 1 | 1 |
| rs6021061 | 1 | 1 | rs6021061 | 1 | 1 |
| rs6021055 | 1 | 1 | rs6021055 | 1 | 1 |
| rs6020989 | 1 | 1 | rs6020989 | 1 | 1 |
| rs4811129 | 1 | 1 | rs4811129 | 1 | 1 |
| rs6067679 | 1 | 1 | rs6067679 | 1 | 1 |
| rs6021041 | 1 | 1 | rs6021041 | 1 | 1 |
| rs2281148 | 1 | 1 | rs2281148 | 1 | 1 |
| rs6021024 | 1 | 1 | rs6021024 | 1 | 1 |
| rs6063608 | 1 | 1 | rs6063608 | 1 | 1 |
| rs6091271 | 1 | 1 | rs6091271 | 1 | 1 |
| rs6013099 | 1 | 1 | rs6013099 | 1 | 1 |
| rs6091265 | 1 | 1 | rs6091265 | 1 | 1 |
| rs8114040 | 1 | 1 | rs8114040 | 1 | 1 |
| rs6020998 | 1 | 1 | rs6020998 | 1 | 1 |
| rs6063617 | 1 | 1 | rs6063617 | 1 | 1 |
| rs6013130 | 1 | 1 | rs6013130 | 1 | 1 |
| rs6021143 | 1 | 1 | rs6021143 | 1 | 1 |
| rs6013181 | 1 | 1 | rs6013181 | 1 | 1 |



|            |   |   |            |   |   |
|------------|---|---|------------|---|---|
| rs6096418  | 1 | 1 | rs6096418  | 1 | 1 |
| rs6013180  | 1 | 1 | rs6013180  | 1 | 1 |
| rs6021173  | 1 | 1 | rs6021173  | 1 | 1 |
| rs6126218  | 1 | 1 | rs6126218  | 1 | 1 |
| rs6126217  | 1 | 1 | rs6126217  | 1 | 1 |
| rs6126216  | 1 | 1 | rs6126216  | 1 | 1 |
| rs6091306  | 1 | 1 | rs6091306  | 1 | 1 |
| rs6096390  | 1 | 1 | rs6096390  | 1 | 1 |
| rs6096389  | 1 | 1 | rs6096389  | 1 | 1 |
| rs6021144  | 1 | 1 | rs6021144  | 1 | 1 |
| rs6021096  | 1 | 1 | rs6021096  | 1 | 1 |
| rs7268201  | 1 | 1 | rs7268201  | 1 | 1 |
| rs6013147  | 1 | 1 | rs6013147  | 1 | 1 |
| rs7344636  | 1 | 1 | rs7344636  | 1 | 1 |
| rs6013140  | 1 | 1 | rs6013140  | 1 | 1 |
| rs6123009  | 1 | 1 | rs6123009  | 1 | 1 |
| rs6021111  | 1 | 1 | rs6021111  | 1 | 1 |
| rs7344903  | 1 | 1 | rs7344903  | 1 | 1 |
| rs6013134  | 1 | 1 | rs6013134  | 1 | 1 |
| rs6013133  | 1 | 1 | rs6013133  | 1 | 1 |
| rs6021097  | 1 | 1 | rs6021097  | 1 | 1 |
| rs7273171  | 1 | 1 | rs7273171  | 1 | 1 |
| rs6020821  | 1 | 1 | rs6020821  | 1 | 1 |
| rs6096187  | 1 | 1 | rs6096187  | 1 | 1 |
| rs238301   | 1 | 1 | rs238301   | 1 | 1 |
| rs238300   | 1 | 1 | rs238300   | 1 | 1 |
| rs238299   | 1 | 1 | rs238299   | 1 | 1 |
| rs6067583  | 1 | 1 | rs6067583  | 1 | 1 |
| rs6013038  | 1 | 1 | rs6013038  | 1 | 1 |
| rs6067582  | 1 | 1 | rs6067582  | 1 | 1 |
| rs6067581  | 1 | 1 | rs6067581  | 1 | 1 |
| rs7344607  | 1 | 1 | rs7344607  | 1 | 1 |
| rs6096147  | 1 | 1 | rs6096147  | 1 | 1 |
| rs7262900  | 1 | 1 | rs7262900  | 1 | 1 |
| rs6096145  | 1 | 1 | rs6096145  | 1 | 1 |
| rs6091227  | 1 | 1 | rs6091227  | 1 | 1 |
| rs6067570  | 1 | 1 | rs6067570  | 1 | 1 |
| rs6013024  | 1 | 1 | rs6013024  | 1 | 1 |
| rs6020780  | 1 | 1 | rs6020780  | 1 | 1 |
| rs6020773  | 1 | 1 | rs6020773  | 1 | 1 |
| rs11905689 | 1 | 1 | rs11905689 | 1 | 1 |
| rs6020758  | 1 | 1 | rs6020758  | 1 | 1 |
| rs6020753  | 1 | 1 | rs6020753  | 1 | 1 |
| rs6096107  | 1 | 1 | rs6096107  | 1 | 1 |
| rs6096188  | 1 | 1 | rs6096188  | 1 | 1 |
| rs6020852  | 1 | 1 | rs6020852  | 1 | 1 |
| rs6020928  | 1 | 1 | rs6020928  | 1 | 1 |
| rs6067647  | 1 | 1 | rs6067647  | 1 | 1 |
| rs7267169  | 1 | 1 | rs7267169  | 1 | 1 |
| rs6013087  | 1 | 1 | rs6013087  | 1 | 1 |

|           |   |   |           |   |   |
|-----------|---|---|-----------|---|---|
| rs6512698 | 1 | 1 | rs6512698 | 1 | 1 |
| rs6020969 | 1 | 1 | rs6020969 | 1 | 1 |
| rs7273920 | 1 | 1 | rs7273920 | 1 | 1 |
| rs8124963 | 1 | 1 | rs8124963 | 1 | 1 |
| rs6512695 | 1 | 1 | rs6512695 | 1 | 1 |
| rs6020938 | 1 | 1 | rs6020938 | 1 | 1 |
| rs238309  | 1 | 1 | rs238309  | 1 | 1 |
| rs6067617 | 1 | 1 | rs6067617 | 1 | 1 |
| rs6067593 | 1 | 1 | rs6067593 | 1 | 1 |
| rs6126146 | 1 | 1 | rs6126146 | 1 | 1 |
| rs6067609 | 1 | 1 | rs6067609 | 1 | 1 |
| rs238308  | 1 | 1 | rs238308  | 1 | 1 |
| rs238307  | 1 | 1 | rs238307  | 1 | 1 |
| rs6096206 | 1 | 1 | rs6096206 | 1 | 1 |
| rs238303  | 1 | 1 | rs238303  | 1 | 1 |
| rs6020863 | 1 | 1 | rs6020863 | 1 | 1 |
| rs6013045 | 1 | 1 | rs6013045 | 1 | 1 |
| rs6020862 | 1 | 1 | rs6020862 | 1 | 1 |
| rs6020860 | 1 | 1 | rs6020860 | 1 | 1 |
| rs6067595 | 1 | 1 | rs6067595 | 1 | 1 |
| rs8126174 | 1 | 1 | rs8126174 | 1 | 1 |

---

**Note:** The imputation was performed from rs16986890 to rs6096781, covering a region of 200,692bp containing 448 SNPs in the HapMap database (19,21). The imputation was performed using the software IMPUTE (22).

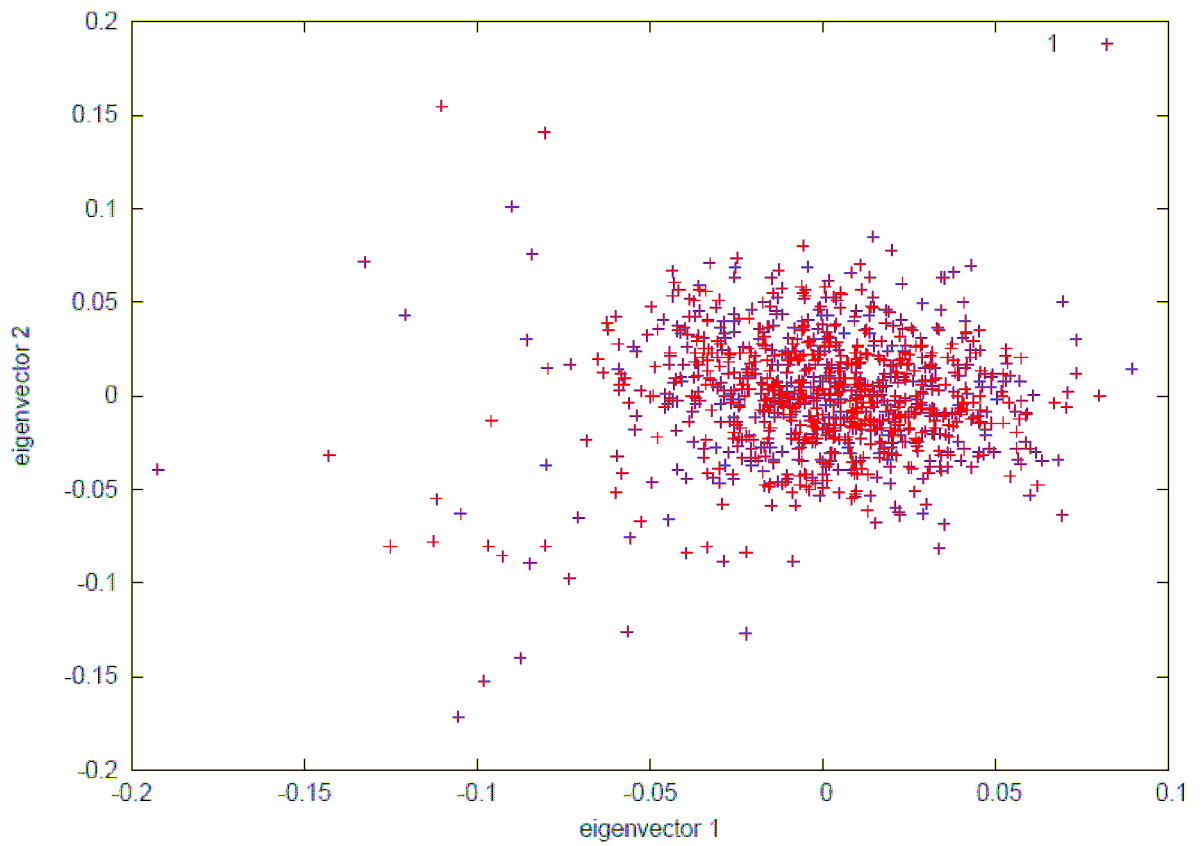

**Supplementary Figure 1.** The top 2 significant eigenvectors in the U.S. Caucasian sample.
